# Supplementary material
Source: PubMed Central journal article supplement (PMC1859934)

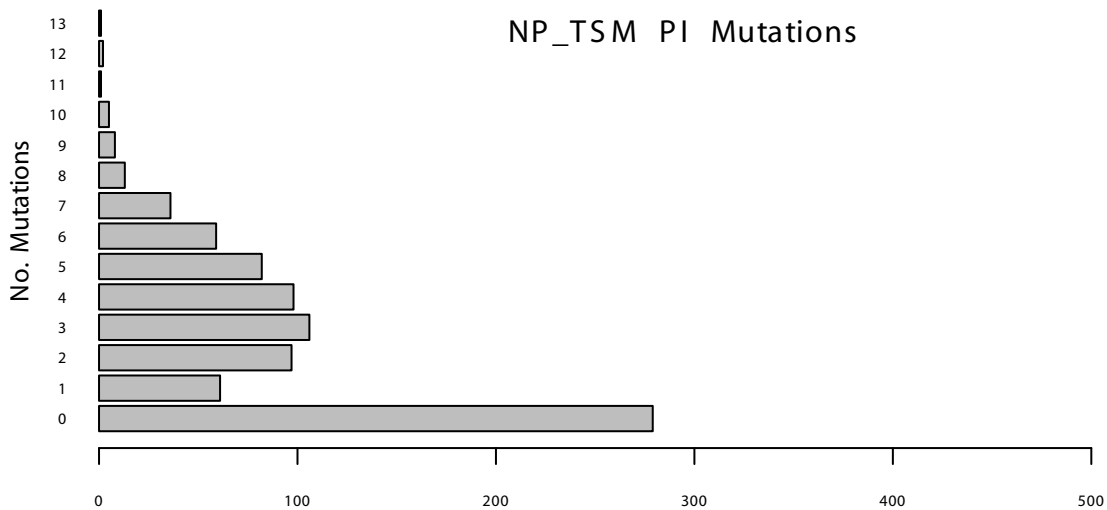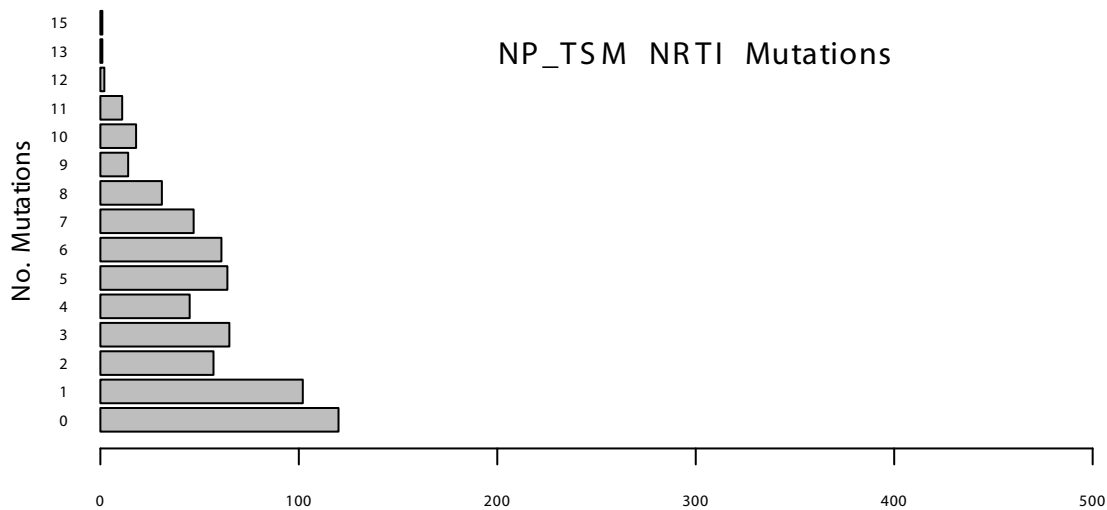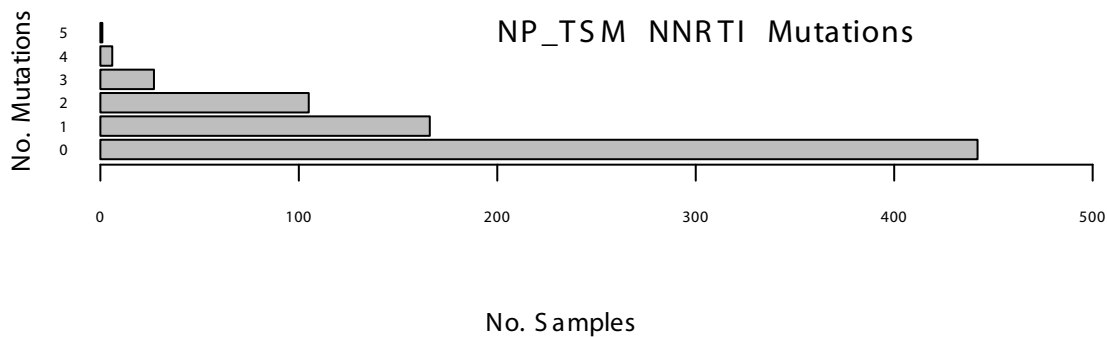

Supplement: pnas_0607274103_1.pdf [file pnas_0607274103_1.pdf]

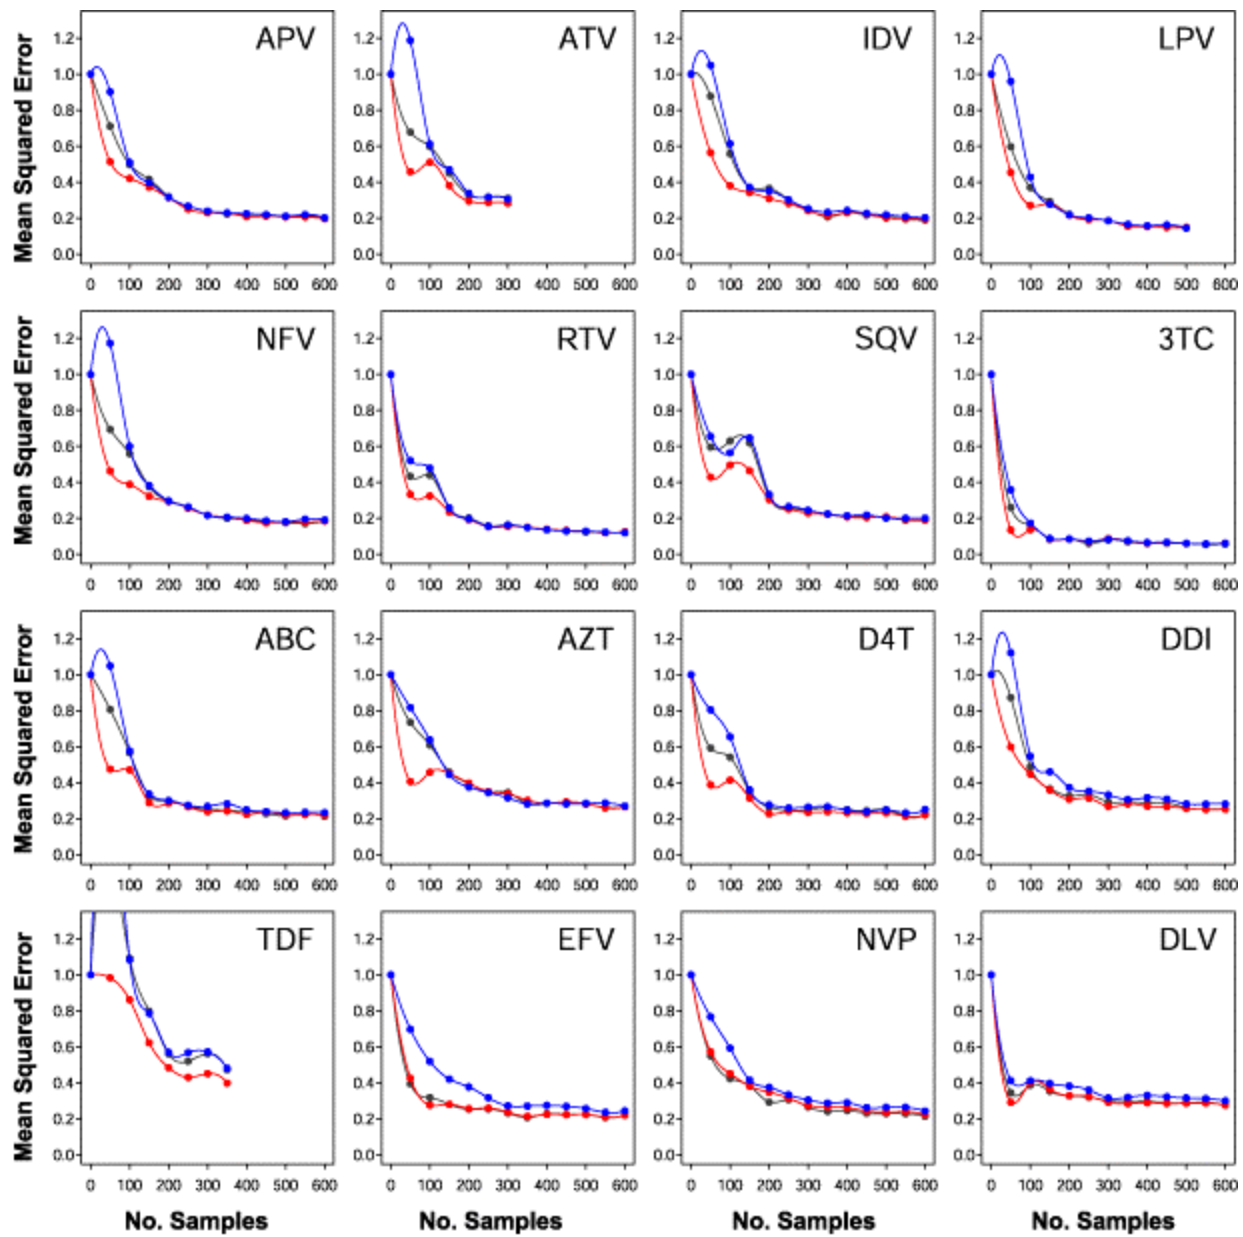

Figure 1

Supplement: pnas_0607274103_3.pdf [file pnas_0607274103_3.pdf]

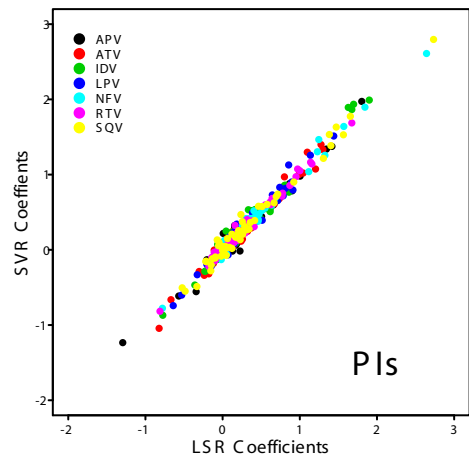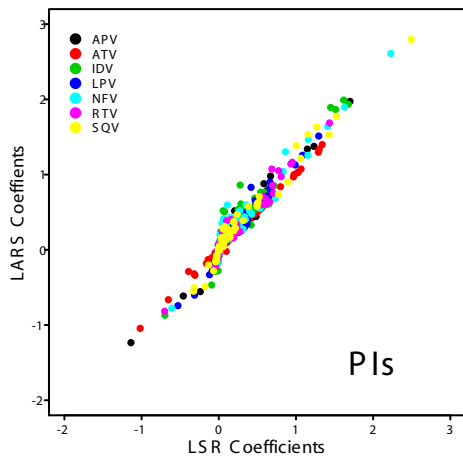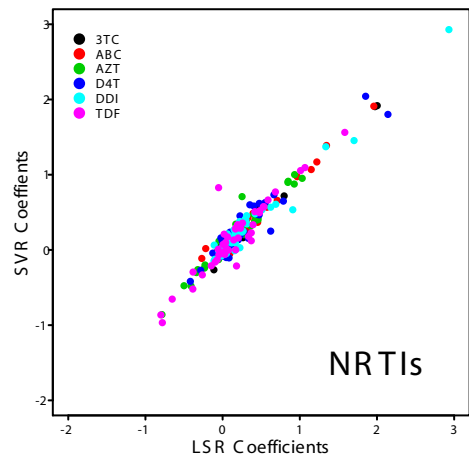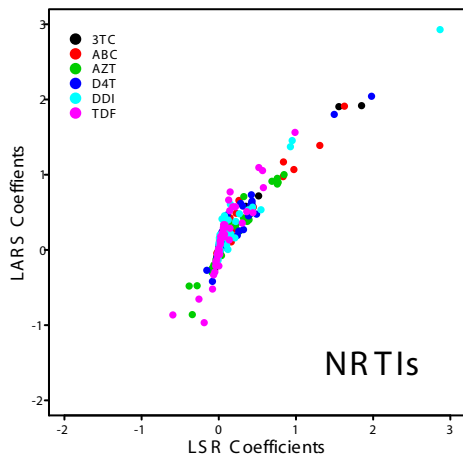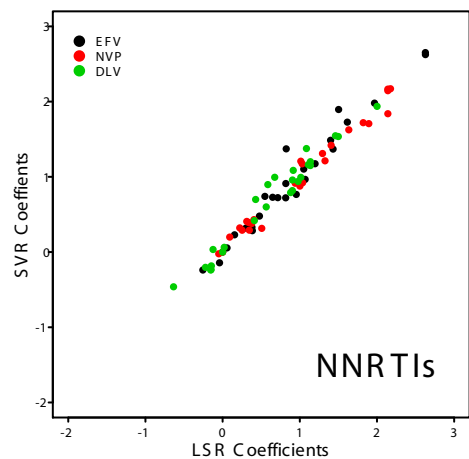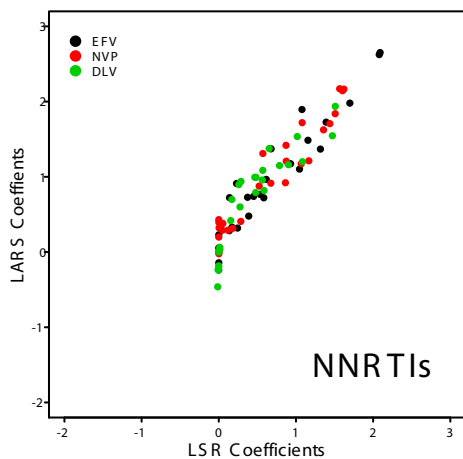

Supplement: pnas_0607274103_4.pdf [file pnas_0607274103_4.pdf]
